# Supplementary material for: Size controlled green synthesis of gold nanoparticles using Coffea arabica seed extract and their catalytic performance in 4-nitrophenol reduction
Source: PubMed Central journal article supplement — RSC Adv. 2018 Jul 11;8(44):24819–26. doi: 10.1039/c8ra04332a (PMC9082294; doi:10.1039/c8ra04332a), 2018-07-11
Supplement: RA-008-C8RA04332A-s001.pdf [file RA-008-C8RA04332A-s001.pdf]

\*Supplementary information

## Size controlled green synthesis of gold nanoparticles using Coffee Arabica Seed extract and their catalytic performance in 4-Nitrophenol reduction

N. K. R. Bogireddy<sup>a</sup>, U. Pal<sup>b</sup>, L Martinez Gomez<sup>c</sup>, V Agarwal<sup>a\*</sup>

<sup>a</sup> Centro de Investigacion en Ingenieria y Ciencias Aplicadas, UAEM, Av. Univ. 1001, Col. Chamilpa, Cuernavaca, Morelos, 62209, México;

<sup>b</sup> Instituto de Física, Benemérita Universidad Autónoma de Puebla, Apdo. Postal J-48, Puebla Pue. 72570, Mexico

<sup>c</sup> Universidad Nacional Autonoma de Mexico, Instituto de Ciencias Fisicas, Avenida Universidad s/n, Cuernavaca, MOR, 62210 Mexico

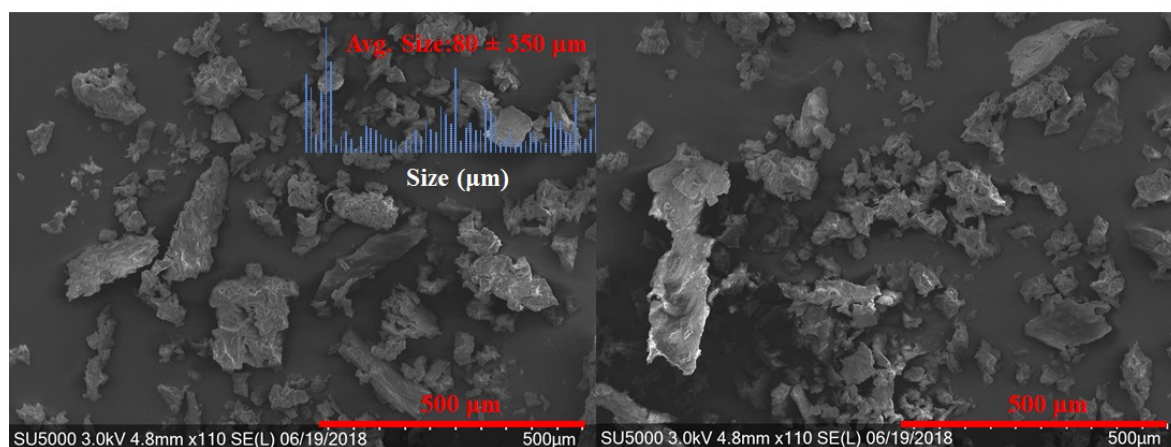

Fig.S1 FE-SEM images of CAS before its use for the preparation of gold nanoparticles (inset shows the average particle size)

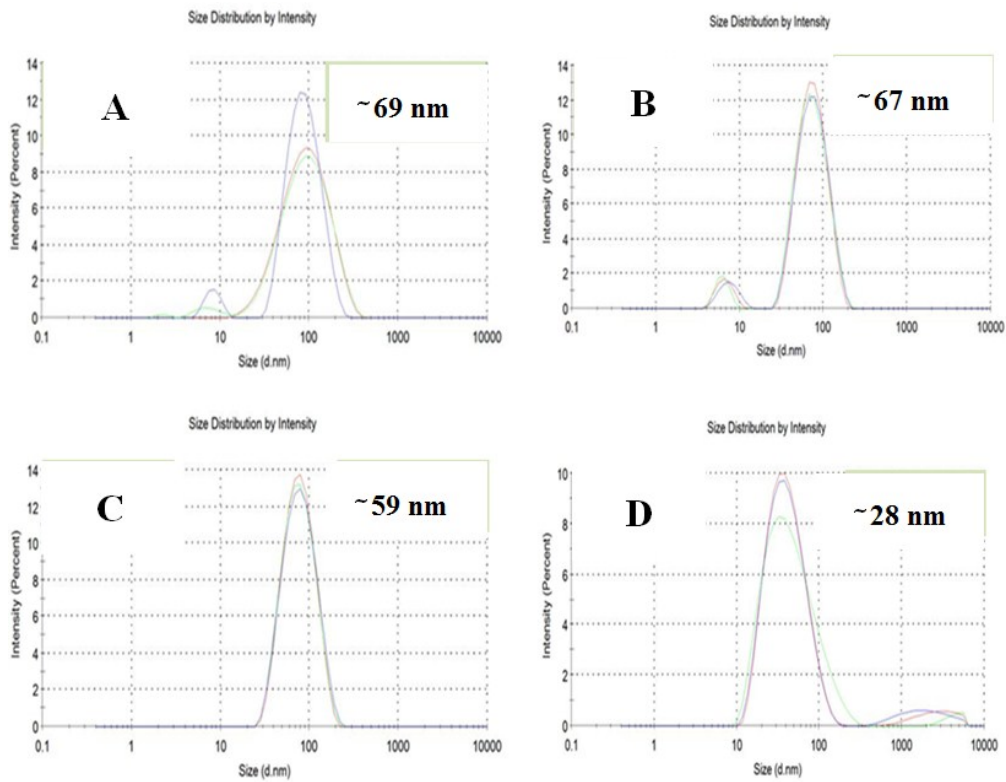

**Figure S2.** DLS results of GAuNPs as a function of extract pH 5, 7, 9 and 10.5 (A-D)

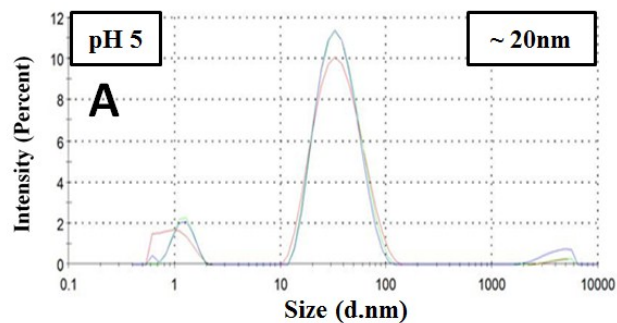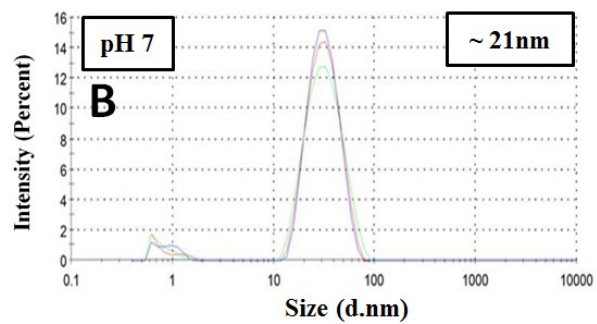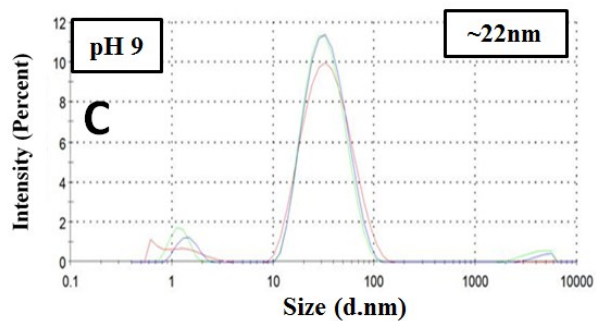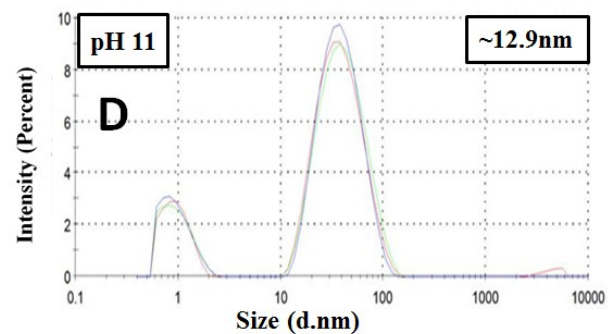

**Figure S3.** DLS results of CAuNPs as a function of pH 5, 7, 9 and 11 (A-D)

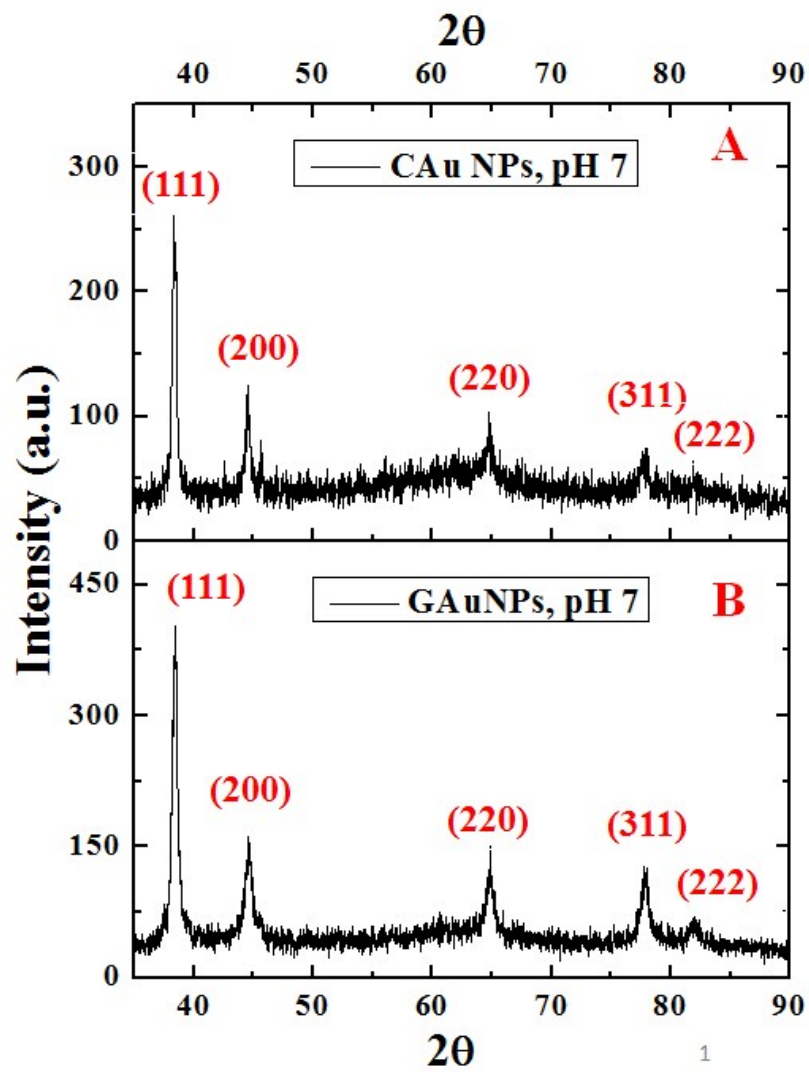

Figure S4. XRD pattern of (A) CAuNPs and (B) GAuNPs synthesized at pH 7 of the reaction mixtures.

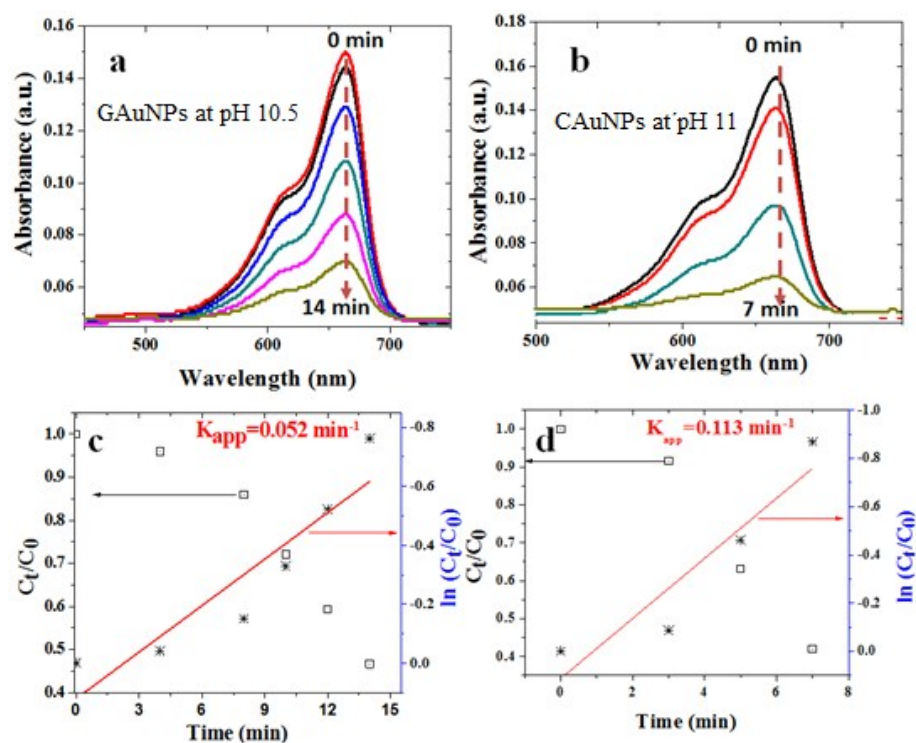

Fig. S5 UV-vis absorbance spectra of methylene blue catalyzed by GAuNPs (pH 10.5) (a) CAuNPs (pH 11) (b), and their kinetic studies GAuNPs (c) and CAuNPs (d)

At the start of the degradation process, the absorbance peak of  $\text{NaBH}_4 + \text{MB}$  is around 662 nm. No change in absorbance peak is observed up to 20 min. After the addition of gold nanoparticles (NPs), the absorbance intensity rapidly decreases and finally disappears within 14 min (Fig S1 a) and 7 min (Fig S1 b) for GAuNPs (at pH 10.5) and CAuNPs (at pH 11), respectively. Pseudo-first-order kinetic equation was

applied to evaluate the catalytic rate. The absorbance of MB was proportional to its concentration in the medium. The calculated rate constant  $k$  was  $0.052 \text{ min}^{-1}$  and  $0.113 \text{ min}^{-1}$  for GAuNPs and CAuNPs, respectively (Fig S2 (c) and (d)).

**Table SI I. Comparison of the rate constants and time to reduce 4-NP using sodium borohydride catalyzed by various size and shape of gold nanoparticles.**

| Size of Au NPs (nm) | Shape         | $k_{\text{app}}$          | Time (min) | Ref.          |
|---------------------|---------------|---------------------------|------------|---------------|
| ~69                 | Poly disperse | $0.0387 \text{ min}^{-1}$ | 53         | Present study |
| ~67                 | Poly disperse | $0.0663 \text{ min}^{-1}$ | 53         | Present study |
| ~59                 | Poly disperse | $0.0538 \text{ min}^{-1}$ | 45         | Present study |
| ~28                 | Poly disperse | $0.0522 \text{ min}^{-1}$ | 38         | Present study |
| ~ 26.5              | Poly disperse | $0.1060 \text{ min}^{-1}$ | 36         | 1             |
| ~22                 | Mono disperse | $0.0882 \text{ min}^{-1}$ | 32         | Present study |
| ~21                 | Mono disperse | $0.0826 \text{ min}^{-1}$ | 30         | Present       |

|      |               |                          |    |               |
|------|---------------|--------------------------|----|---------------|
|      |               |                          |    | study         |
| ~20  | Mono disperse | 0.1009 m <sup>-1</sup>   | 28 | Present study |
| 21.8 | Mono disperse | 0.0044 sec <sup>-1</sup> | 12 | 2             |
| 20   | Mono disperse | 0.0075 sec <sup>-1</sup> | 6  | 2             |
| 14.1 | Mono disperse | 0.0264 sec <sup>-1</sup> | 4  | 2             |
| ~13  | Mono disperse | 0.1401 min <sup>-1</sup> | 22 | Present study |
| 12.9 | Mono disperse | 0.0061 sec <sup>-1</sup> | -- | 3             |
| 6.2  | Mono disperse | 0.0475 sec <sup>-1</sup> | 2  | 2             |
| 3    | Mono disperse | 0.0012 sec <sup>-1</sup> | -- | 3             |

## References

1. N K R Bogireddy, K K H Anand, B K Mandal, J. of Mol. Liq., 2015, 211, 868-875.
2. P. Suchomel, L. Kvitek, R. Prucek, A. Panacek, A. Halder, S. Vajda, R. Zboril, Sci. Rep., 2018, 8, 4589.
3. R. Fenger, E. Fertitta, H. Kirmse, A.F. Thünemann, K. Rademann, Phys. Chem. Chem. Phys., 2012, 14, 9343–9.
